# Supplementary material for: Streptococcus pyogenes Colonization in Children Aged 24–59 Months in the Gambia: Impact of Live Attenuated Influenza Vaccine and Associated Serological Responses
Source: J Infect Dis. 2023 May 29;228(7):957–65. doi: 10.1093/infdis/jiad153 (PMC10547459; doi:10.1093/infdis/jiad153)
Supplement: jiad153_Supplementary_Data [file jiad153_supplementary_data.pdf]

## Supplementary data

### 1. Details of *Streptococcus pyogenes* antigens for ELISA and Luminex

All recombinant proteins for ELISA were derived from the SF370 reference (M1/*emm1*/FCT-2) strain. Recombinant M1/Cpa/Mac(IdeS) were full length proteins, excluding N-terminal signal peptides and C-terminal cell wall anchor domains. Recombinant SpyCEP was a 61 kDa protein of the N-terminal region encompassing two of the three active sites without chemokine cleaving activity.[1]

All antigens for Luminex were donated by GSK Vaccines Institute for Global Health, and derived from SF370 reference strain. Recombinant protein antigens were detoxified SLO (amino acids 32–571), SpyAD (amino acids 27–849), and detoxified SpyCEP, (amino acids 34–1613).[2] GAC is the native carbohydrate with both polyrhamnose backbone and alternating N-acetylglucosamine at the side chain.[3]

#### Protein sequences for ELISA antigens:

##### > M1 48 kDa

MGNGDGNPREVIEDLAANNPAIQNIRLRYENKDLKARLENAMEVAGRDFKRAEELEKAKQ  
ALEDQRKDLETCLKELQQDYDLAKESTSWDRQRLEKELEEKKEALELAIDQASRDYHRAT  
ALEKELEEKKKALELAIDQASQDYNRANVLEKELETITREQEINRNLLGNAKLELDQLSS  
EKEQLTIEKAKLEEEKQISDASRQSLRRDLASREAKKQVEKDLANLTAELDKVKEDKQI  
SDASRQGLRRDLASREAKKQVEKDLANLTAELDKVKEEKQISDASRQGLRRDLASREA  
KKQVEKALEEANSKLAALEKLNKELEESKKLTEKEKAELQAKLEAEAKALKEQLAKQAE  
LAKLRAGKASDSQTPDTKPGNKAVPGKGQAPQAGTKPNQNKAPMKETKRQLEHHHHHH

##### >SpyCEP 61 kDa

MGDELSTMSEPTITNHAQQQAQHLTNTELSSAESKSQDTSQITLKTNREKEQSQDLVSEP  
TTTELADTDAASMAN TGSDATQKSASLPPVNTDVHDWVKTKGAWDKGYKGQGKVVAVIDT  
GIDPAHQSMRISDVSTAKVKSKE DMLARQKAAGINYG SWINDKVVF AHNYVENS DNIKEN  
QFEDFDEDWENFEFDAAEPKAIKKHKIYRPQSTQAPKETVIKTEETDGS HDIDWTQTDD  
DTKYESHGMHVTGIVAGNSKEAAATGERFLGIAPEAQVMFMRVVFANDIMGSAESLFIKAI  
EDAV ALGADV INLSLGTANGAQLSGSKPLMEAIEKAKKAGVSVVVAAGNERVYGS DHDDP  
LATNP DYGLVGSPSTGRTP TSVA AINSKWWIQRLMTVKELENRADLNHGKAIYSESVDFK  
DIKDSLGYDKSHQFAYVKESTDAGYNAQDVKGKIALIERDPN KTYDEMIALAKKHGALGV  
LI FNNKPGQSNRSMRLTANGMGI PSAFI SHEFGKAMSQ L NGNGTGSLEFDSVVSKAPSQK  
GNEMNHFSNWGLTSDLEHHHHHH

##### >Cpa 77 kDa

MGKTVFGLVESSTPNAINPDSSSEYRWYGYESYVRGHPYKQFRVAHDLRVNLEGSRSYQ  
VYCFNLKKAFFPLGSDSSVKKWYKKHDGISTKFEDYAMSPRITGDELNQKLRAVMYNGHPQ  
NANGIMEGLEPLNAIRVTQEAVWYYS DNAPISNPDESFKRESESNLVSTS QLSLMRQALK  
QLIDPNLATKMPKQVPDDFQLSIFESEDKGDKYNKGYQNLLSGGLVP TKPPTPGDPPMP  
NQPQTTSVLIRKYAIGDYSKLLEGATLQLTGDNVNSFQARVFSSNDIGERIELSDGTYTL  
TELNSPAGYSIAEPITFKVEAGKVYTIIDGKQIENPNKEIVEPYSVEAYNDFEEF SVLTT  
QNYAKFYAKNKNSSQVVYCFNADLKSPDSEDGGKTMTPDFTTG EVKYTHIAGRDLFK  
YTVKPRDTPDPTFLKHIKKVIEKGYREKGQAIEYSGLTETQLRAATQLAIYYFTDSAELD  
KDKL KDYHGF GDMNDSTLAVAKILVEYAQDSNPPQLTDLDFFI PNNNKYQSLIGTQWHPE  
DLVDI IRMEDKKEVIPVTHNLTLRKTVTGLAGDR TKDFHFEIELKNNKQELLSQTVKTDK

TNLEFKDGKATINLKHGESLTQLGLPEGYSYLVKETDSEGYKVKVNSQEVANATVSKTGI  
TSDETLAFENNKEPLEHHHHHH

**>Mac 36 kDa**

MGSANQEIRYSEVTPYHVTSVWTKGVTPPANFTQGEDVFHAPYVANQGWDITKTFNGKD  
DLLCGAATAGNMLHWWFDQNKDQIKRYLEEHPEKQKINFNGEQMFDVKEAIDTKNHQLDS  
KLF EYFKEKAFPYLS TKHLGVFPDHVIDMFINGYRLSLTNHGPTPVKEGSKDPRGGIFDA  
VFTRGDQSKLLTSRHDFKEKNLKEISDLIKKELTEGKALGLSHTYANVRINHVINLWGAD  
FDSNGNLKAIYVTDSDSNASIGMKKYFVGVNSAGKVAISAKEIKEDNIGAQVLGLFTLST  
GQDSWNQTNLEHHHHHHH

**>SpyAD 89 kDa**

MGDRASGETKASNTHDDSLPKPETIQEAKATIDAVEKTLSSQQAELTELATALTKTTAEINH  
LKEQQDNEQKALTSAQEIYTNTLASSEETLLAQGAEHQRELTATETELHNAQADQHSKET  
ALSEQKASISAETTRAQDLVEQVKTSEQNIAKLNAMISNPDAITKAAQTANDNTKALSSE  
LEKAKADLENQKAKVKKQLTEELAAQKAALAEKEAELSRLKSSAPSTQDSIVGNNTMKAP  
QGYPLEELKKLEASGYIGSASYNYYKEHADQIIAKASPGNQLNQYQDIPADRNRFVDPD  
NLTPEVQNELAQFAAHMINSVRRQLGLPPVTVTAGSQEFARLLSTSYKKTHGNTRPSFVY  
GQPGVSGHYGVGPHDKTIIEDSAGASGLIRNDDNMYENIGAFNDVHTVNGIKRGIYDSIK  
YMLFTDHLHGNTYGHAINFLRVDKHNPNAPVYLGFTSNVGSLSNEHFVMFPESNIANHQR  
FNKTPIKAVGSTKDYAQRVGTVSDTIAAIKGVSSLENRLSAIHQEADIMAAQAKVSQLO  
GKLASTLKQSDSLNLQVRQLNDTKGSLRTELLAAKAKQAQLEATRDQSLAKLASLKAALH  
QTEALAEQAAARVTALVAKKAHLQYLRDFKLNPNRLQVIRERIDNTKQDLAKTTSSLNA  
QEALAAALQAKQSSLEATATTEHQLTLLKTLANEKEYRHLDEDIATVPDLQVAPPLTG VK  
PLSYSKIDTTPLVQEMVKETKQLLEASARLAAENTSLVAEALVGQTSEMVASNAIVSKIT  
SSITQPSSKTSYSGSGSSTTSNLI SDVDESTQRLEHHHHHHH

## Supplementary Figures and Tables

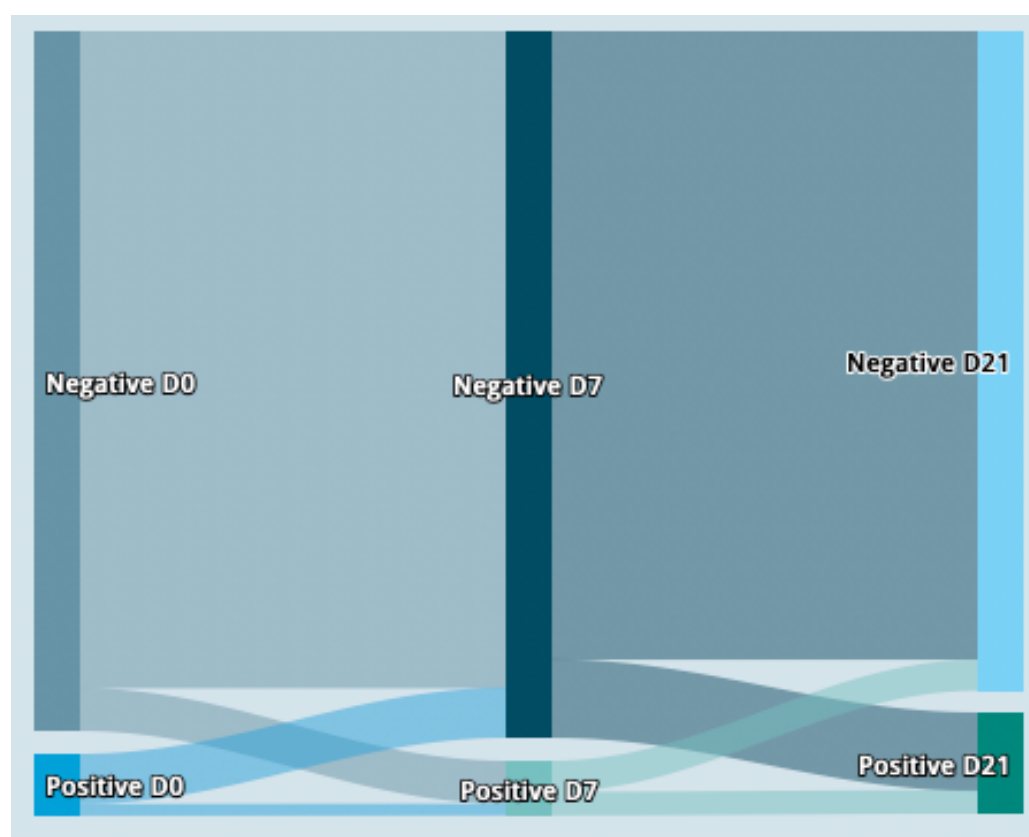

**Figure S1: Colonization status over time.** Sankey plot demonstrating the proportion of participants with positive and negative colonization status at each time point in the study. Colonization status determined by quantitative PCR targeting *speB*.

**Table S1. *S. pyogenes* colonization during the study period.** Colonization was determined by a *speB* real-time polymerase chain reaction at day 0, day 7 and day 21 of the study in children in the LAIV and control groups.

| <b>Time point</b> | <b>N</b> | <b>Overall, N = 320<sup>1</sup></b> | <b>LAIV, N = 212<sup>1</sup></b> | <b>Control, N = 108<sup>1</sup></b> | <b>p-value<sup>2</sup></b> |
|-------------------|----------|-------------------------------------|----------------------------------|-------------------------------------|----------------------------|
| <b>Baseline</b>   | 320      |                                     |                                  |                                     | 0.068                      |
| negative          |          | 294 (92%)                           | 199 (94%)                        | 95 (88%)                            |                            |
| positive          |          | 26 (8.1%)                           | 13 (6.1%)                        | 13 (12%)                            |                            |
| <b>Day 7</b>      | 320      |                                     |                                  |                                     | 0.7                        |
| negative          |          | 297 (93%)                           | 196 (92%)                        | 101 (94%)                           |                            |
| positive          |          | 23 (7.2%)                           | 16 (7.5%)                        | 7 (6.5%)                            |                            |
| <b>Day 21</b>     | 320      |                                     |                                  |                                     | 0.4                        |
| negative          |          | 277 (87%)                           | 181 (85%)                        | 96 (89%)                            |                            |
| positive          |          | 43 (13%)                            | 31 (15%)                         | 12 (11%)                            |                            |
| <b>Anytime</b>    | 320      |                                     |                                  |                                     | 0.8                        |
| negative          |          | 249 (78%)                           | 164 (77%)                        | 85 (79%)                            |                            |
| positive          |          | 71 (22%)                            | 48 (23%)                         | 23 (21%)                            |                            |

<sup>1</sup> n (%)

<sup>2</sup> Pearson's Chi-squared test

**Table S2. Factors associated with new colonization at D7 or D21 in the acquisition study group (n=294)**

| Characteristic                                         | OR <sup>1</sup> | 95% CI <sup>1</sup> | p-value |
|--------------------------------------------------------|-----------------|---------------------|---------|
| Age in months                                          | 0.99            | 0.96, 1.03          | 0.7     |
| Intervention (Vaccinated)                              | 1.92            | 0.93, 4.31          | 0.094   |
| sex                                                    |                 |                     |         |
| F                                                      | —               | —                   |         |
| M                                                      | 1.34            | 0.69, 2.62          | 0.4     |
| Positive respiratory virus at day 0                    | 1.71            | 0.88, 3.28          | 0.11    |
| <sup>1</sup> OR = Odds Ratio, CI = Confidence Interval |                 |                     |         |

\*p values for factors associated with new *Streptococcus pyogenes* acquisition within the acquisition study group (n=294) are derived from a logistic regression model with a composite outcome of colonization at either D7 or D21.

**Table S3 Factors associated with *S. pyogenes* colonization prevalence in the entire cohort.**

|                                            | OR   | 95% CI     | p-value <sup>1</sup> |
|--------------------------------------------|------|------------|----------------------|
| <i>Intervention (vaccinated)</i>           | 0.41 | 0.14-1.14  | 0.09                 |
| <i>Day 21 (vs day 0)</i>                   | 0.88 | 0.34-2.28  | 0.8                  |
| <i>Day 7 (vs day 0)</i>                    | 0.41 | 0.14-1.22  | 0.11                 |
| <i>Positive respiratory virus at day 0</i> | 1.79 | 0.9-3.54   | 0.09                 |
| <i>Age</i>                                 | 0.98 | 0.94-1.02  | 0.29                 |
| <i>Sex Male (vs female)</i>                | 0.97 | 0.5-1.88   | 0.93                 |
| <i>Intervention (vaccinated): Day 21</i>   | 3.86 | 1.12-13.27 | <b>0.03</b>          |
| <i>Intervention (vaccinated): Day 7</i>    | 3.2  | 0.8-12.77  | 0.1                  |

<sup>1</sup>p values for factors associated with *S. pyogenes* colonization are derived from a generalised logistic mixed-effect model, taking into account changes within individuals over time. Given the significant interaction between Intervention and Visit variables, the model was tested on both the vaccinated (intervention) and unvaccinated groups.

**Table S4. Factors associated with *S. pyogenes* colonization prevalence in the unvaccinated group.**

|                                            | <i>OR</i> | <i>95% CI</i> | <i>p-value</i> <sup>1</sup> |
|--------------------------------------------|-----------|---------------|-----------------------------|
| <i>Day 21 (vs day 0)</i>                   | 0.86      | 0.3-2.51      | 0.79                        |
| <i>Day 7 (vs day 0)</i>                    | 0.34      | 0.09-1.27     | 0.11                        |
| <i>Positive respiratory virus at day 0</i> | 2.55      | 0.53-12.34    | 0.25                        |
| <i>Age</i>                                 | 1         | 0.92-1.1      | 0.95                        |
| <i>Sex Male (vs female)</i>                | 0.98      | 0.2-4.73      | 0.98                        |

<sup>1</sup>p values for factors associated with *S. pyogenes* colonization in the live attenuated influenza vaccine group are derived from a generalised logistic mixed-effect model, taking into account changes within individuals over time.

**Table S5A. Comparison of *S. pyogenes* density (log10 copies /mL) measured by qPCR in colonized participants (n=71) between vaccinated and unvaccinated groups at each time point of the study**

|                                      | Study group       |                      | p-value <sup>2</sup> |
|--------------------------------------|-------------------|----------------------|----------------------|
|                                      | LAIV <sup>1</sup> | Control <sup>1</sup> |                      |
| D0                                   | 4.16 (1.10)       | 3.95 (0.89)          | 0.6                  |
| D7                                   | 4.43 (1.20)       | 5.24 (1.27)          | 0.2                  |
| D21                                  | 3.93 (0.84)       | 4.58 (1.27)          | 0.12                 |
| <sup>1</sup> Mean (SD)               |                   |                      |                      |
| <sup>2</sup> Welch Two Sample t-test |                   |                      |                      |

**Table S5B. Comparison of *S. pyogenes* density (log10 copies /mL) measured by qPCR in episodes of colonization at D0 or D7 that were followed by persistent detection at the next episode (n=15) or not (n=31)**

|                                      | Persistently positive episodes |                  | p-value <sup>2</sup> |
|--------------------------------------|--------------------------------|------------------|----------------------|
|                                      | No <sup>1</sup>                | Yes <sup>1</sup> |                      |
| Colonization density                 | 4.27 (1.23)                    | 4.37 (1.01)      | 0.8                  |
| <sup>1</sup> Mean (SD)               |                                |                  |                      |
| <sup>2</sup> Welch Two Sample t-test |                                |                  |                      |

\* Each PCR confirmed colonisation event at D0 and D7 was characterised as a “persistent episode” if at the subsequent study visit they remained positive.

**Table S6. Comparison of symptoms reported by study participants by day 21 of the study in those who did or did not acquire *S. pyogenes* colonization.**

| Symptoms                                                     | Acquisition status       |                          | p-value <sup>2</sup> |
|--------------------------------------------------------------|--------------------------|--------------------------|----------------------|
|                                                              | No, N = 249 <sup>1</sup> | Yes, N = 45 <sup>1</sup> |                      |
| fever                                                        | 51 (20%)                 | 12 (27%)                 | 0.4                  |
| cough                                                        | 94 (38%)                 | 14 (31%)                 | 0.4                  |
| runny nose                                                   | 118 (47%)                | 26 (58%)                 | 0.2                  |
| sore throat                                                  | 1 (0.4%)                 | 2 (4.4%)                 | 0.062                |
| skin sore                                                    | 6 (2.4%)                 | 4 (8.9%)                 | 0.050                |
| <sup>1</sup> n (%)                                           |                          |                          |                      |
| <sup>2</sup> Pearson's Chi-squared test; Fisher's exact test |                          |                          |                      |

**Table S7. Comparison of age (in months) between colonized and non-colonized participants included in serological study (n=101).**

| <b>Characteristic</b>               | <b>colonised,<br/>N = 40<sup>1</sup></b> | <b>non-colonised,<br/>N = 61<sup>1</sup></b> | <b>p-<br/>value<sup>2</sup></b> |
|-------------------------------------|------------------------------------------|----------------------------------------------|---------------------------------|
| age                                 | 36 (29, 43)                              | 32 (28, 39)                                  | 0.3                             |
| <sup>1</sup> Median (IQR)           |                                          |                                              |                                 |
| <sup>2</sup> Wilcoxon rank sum test |                                          |                                              |                                 |

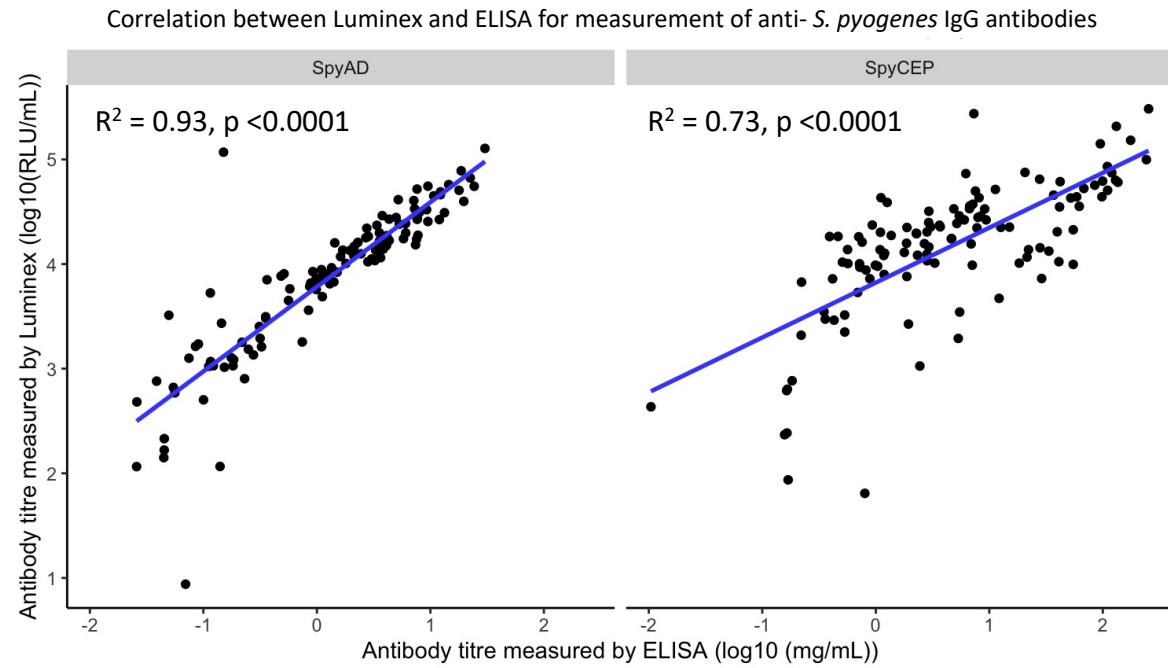

**Figure S2:** Correlation between IgG antibody titres measured from individual participants using ELISA and Luminex platforms. Log10 transformed IVIG-adjusted anti- protein activity for ELISA and Relative Luminex Units (RLU) for Luminex were analysed for correlation with Spearman method. Antigens used in the Luminex assay were obtained from National Institute of Biological Standards and Control, UK. Antigens in Luminex assay were obtained from GSK Vaccine institute for Global Health.

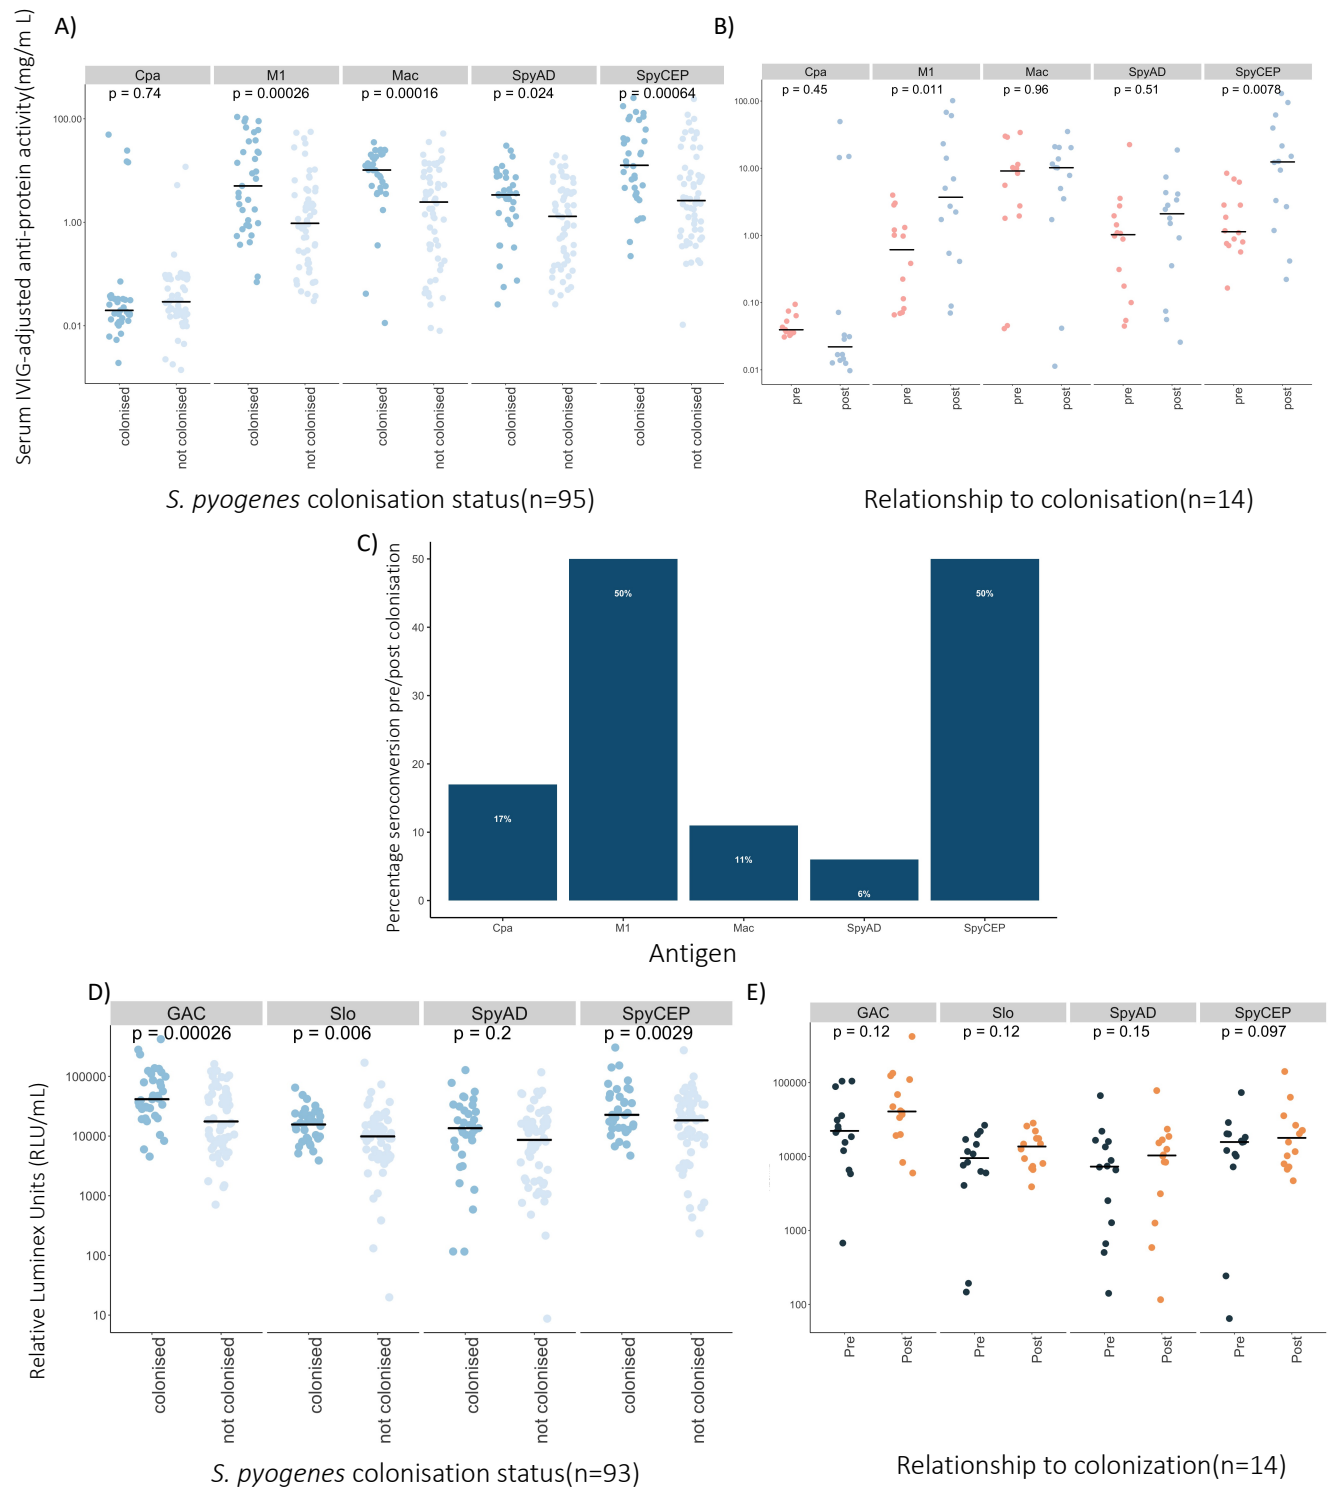

**Figure S3. Serological responses to *S. pyogenes* colonization measured by ELISA and Luminex 4-plex, excluding 6 participants with sore throat (n=2) and/or infected skin sores (n=5) to ensure symptomatic pharyngitis or skin infection was not driving the serological responses observed in colonized children. A.** Comparison of anti-protein IgG activity to Cpa, M1, Mac, SpyCEP, and SpyAD in participants (n=95) according to anytime *S. pyogenes* colonization status. **B.** Paired comparison of anti-protein IgG activity to Cpa, M1, Mac, SpyCEP, and SpyAD between day 0 and day 21 in newly colonized participants (n=14). Log10 transformed IVIG-adjusted anti-protein activity was compared with t-tests

(unpaired and paired respectively), horizontal line depicts the median value. **C.** Percentage of study participants (n=14) acquiring *S. pyogenes* during the study who seroconverted between day 0 and day 21. **D.** Comparison of IgG activity to GAC, SLO, SpyCEP, and SpyAD in participants (n=93) according to anytime *S. pyogenes* colonization status. **E.** Paired comparison of IgG activity to GAC, SLO, SpyCEP, and SpyAD between D0 and D21 in newly-colonized participants (n=14). Log<sub>10</sub> transformed IVIG-adjusted anti-antigen activity was compared with t-tests (unpaired and paired respectively). Horizontal bar depicts the median value.

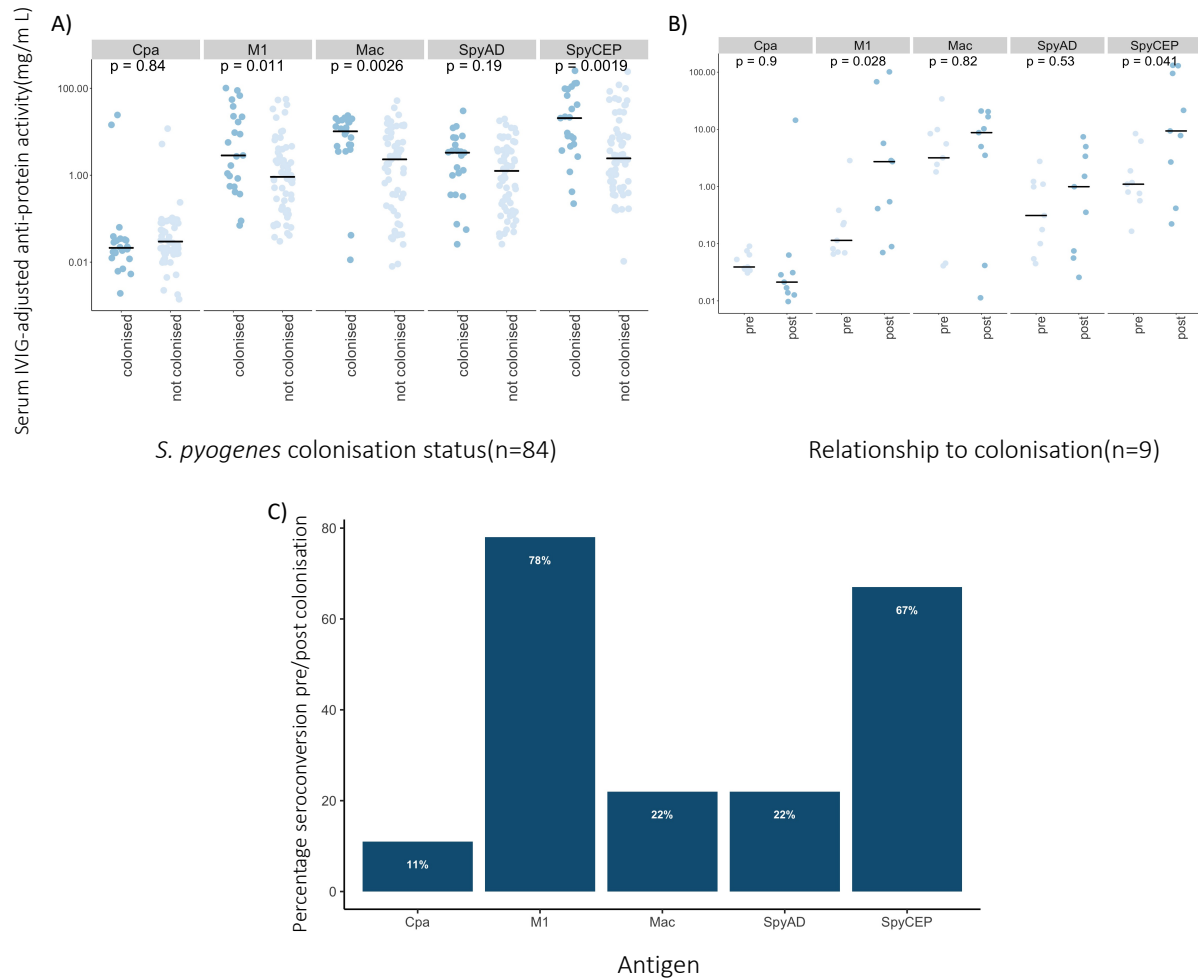

**Figure S4. Serological responses to *S. pyogenes* colonization measured by ELISA excluding participants who were only colonized at D21, thereby attributing any serological responses to events occurring at least 14 days prior to serological measurement. A.** Comparison of anti-protein IgG activity to Cpa, M1, Mac, SpyCEP, and SpyAD in participants (n=84) according to *S. pyogenes* colonization status on D0 or D7 of study. **B.** Paired comparison of anti-protein IgG activity to Cpa, M1, Mac, SpyCEP, and SpyAD between day 0 and day 21 in participants newly colonized (n=9) on D7 of study. Log<sub>10</sub> transformed IVIG-adjusted anti-protein activity was compared with t-tests (unpaired and paired respectively), horizontal line depicts the median value. **C.** Percentage of study participants (n=18) acquiring *S. pyogenes* during the study who seroconverted between day 0 and day 21.

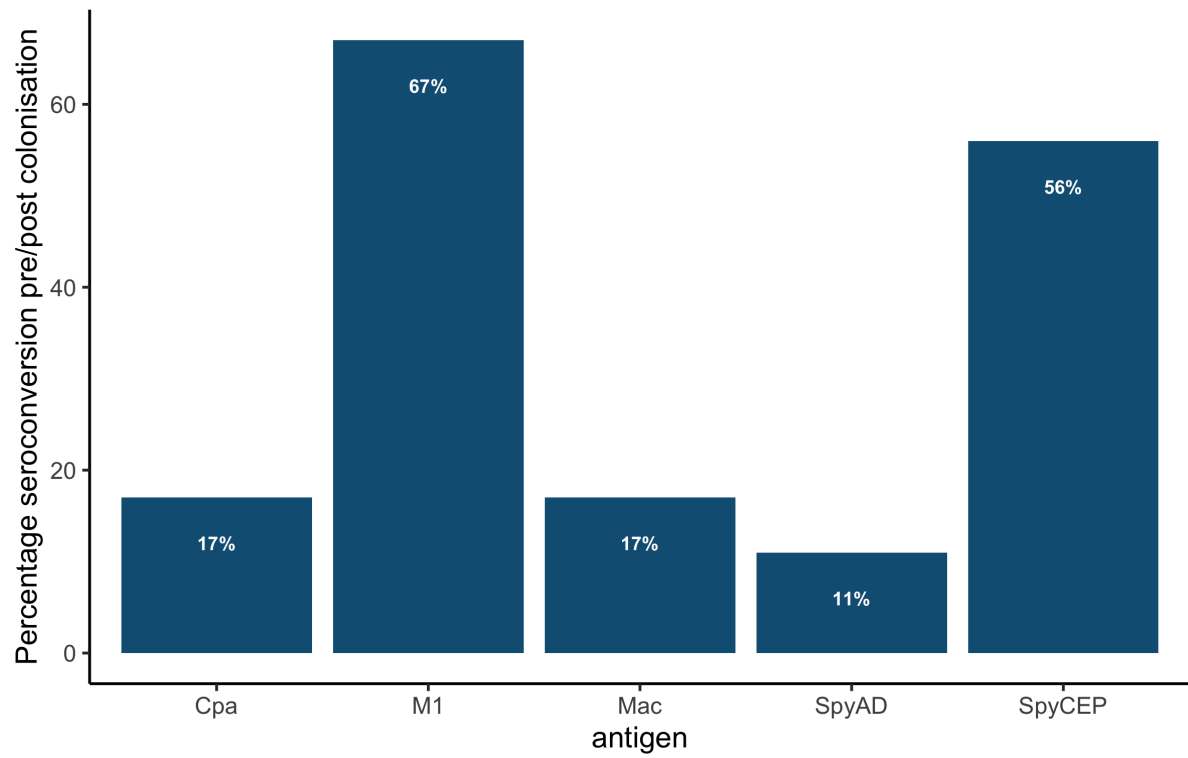

**Figure S5: Percentage of newly-colonized study participants (n=18) who seroconverted between day 0 and day 21, using a more conservative definition of 4-fold increase in IgG titre measured by ELISA.**

Supplementary references:

1. Shaw HA, Ozanne J, Burns K, Mawas F. Multicomponent Vaccines against Group A Streptococcus Can Effectively Target Broad Disease Presentations. *Vaccines*. Vol. 9, **2021**.
2. Bensi G, Mora M, Tuscano G, et al. Multi high-throughput approach for highly selective identification of vaccine candidates: the Group A Streptococcus case. *Mol Cell Proteomics* **2012**; 11:M111.015693.
3. Kabanova A, Margarit I, Berti F, et al. Evaluation of a Group A Streptococcus synthetic oligosaccharide as vaccine candidate. *Vaccine* **2010**; 29:104-14.
